# Supplementary material
Source: Springer Nature journal article supplement (https://www.springermedizin.de/resource/supplementary/12885_2013_4157_MOESM3_ESM.pdf/9465612)

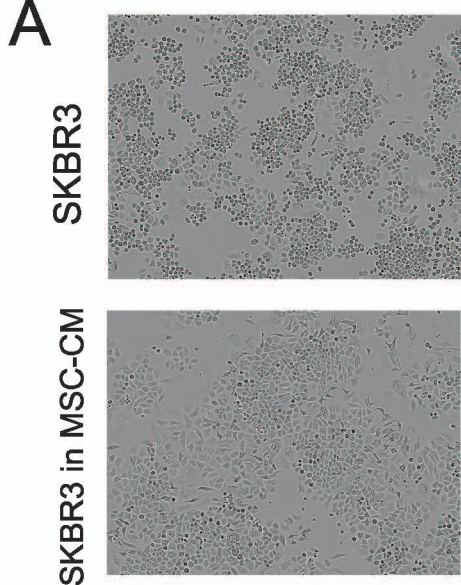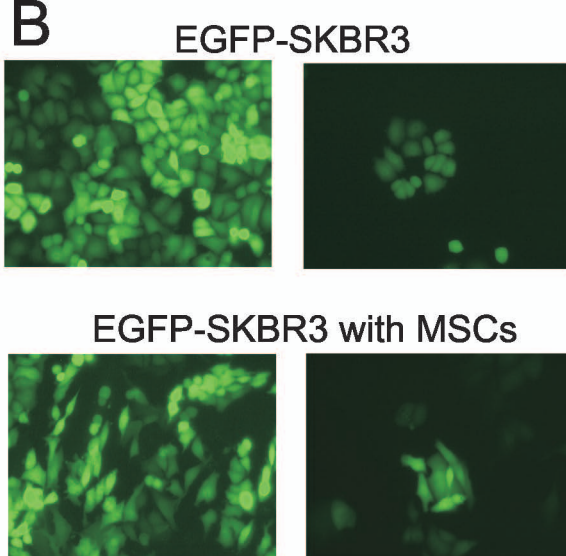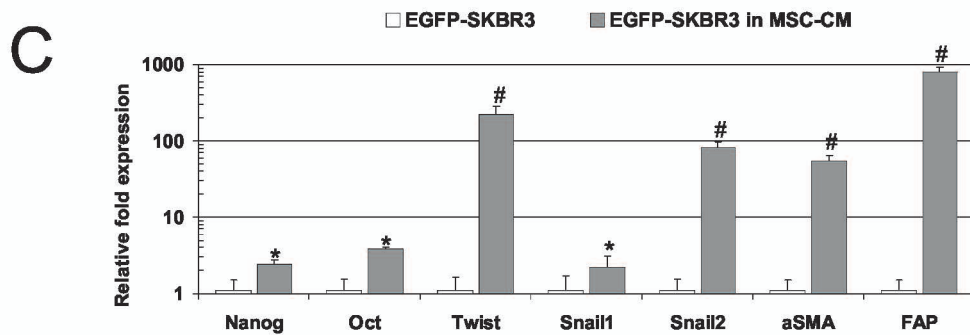

**D**

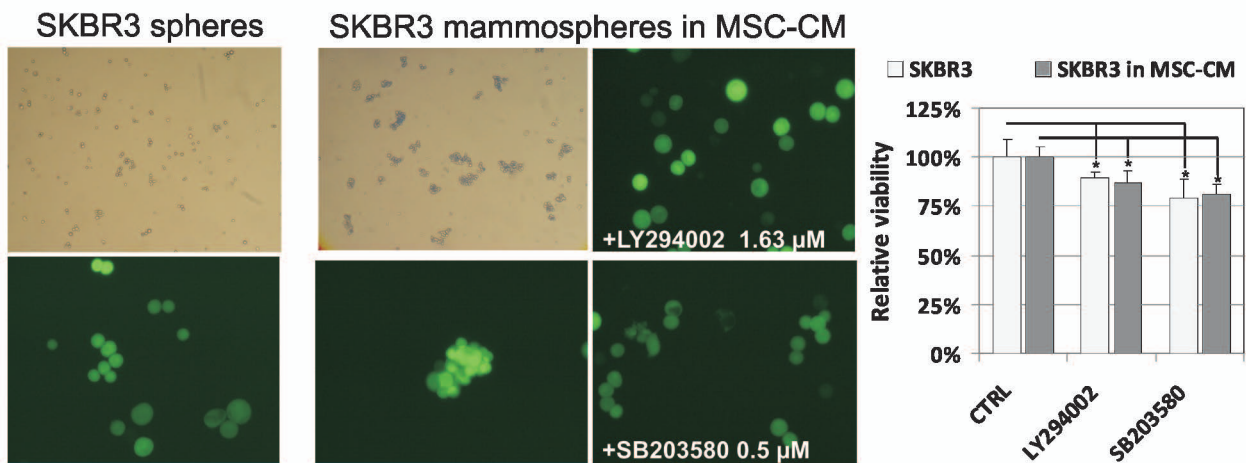

Supplement: MOESM3 [file 9465612]
